# Supplementary material for: One-pot synthesis of 3D hierarchical porous Li3V2(PO4)3/C nanocomposites for high-rate and long-life lithium ion batteries
Source: Royal Society of Chemistry journal article supplement (doi:10.1039/c7ra06706b), 2017-01-01
Supplement: c7ra06706b1.pdf [file c7ra06706b1.pdf]

## Supporting Information

### One-Pot Synthesis of 3D Hierarchical Porous $\text{Li}_3\text{V}_2(\text{PO}_4)_3/\text{C}$ Nano Composites for High-Rate and Long-Life Lithium ion Batteries

Yi Cheng <sup>a,b</sup>, Wei Zhou <sup>a,b</sup>, Kai Feng <sup>\*a,c</sup>, Hongzhang Zhang <sup>a</sup>, Xianfeng Li <sup>a,c</sup>, Huamin Zhang <sup>\*a,c</sup>

<sup>a</sup>*Division of Energy Storage, Dalian Institute of Chemical Physics, Chinese Academy of Sciences, Zhongshan Road 457, Dalian 116023, China*

<sup>b</sup>*University of Chinese Academy of Sciences, Beijing 100039, China*

<sup>c</sup>*Collaborative Innovation Center of Chemistry for Energy Materials, Dalian, 116023, China*

\*Corresponding author

**E-mail:** fengkai17@dicp.ac.cn

**Tel:** +86-0411-84379536

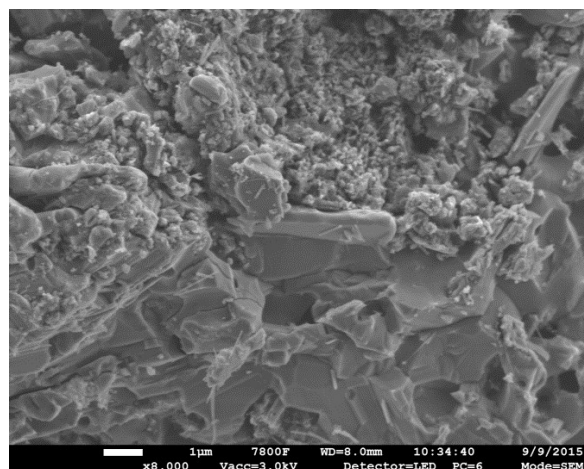

**Fig. S1.** SEM of the reference sample LVP-C

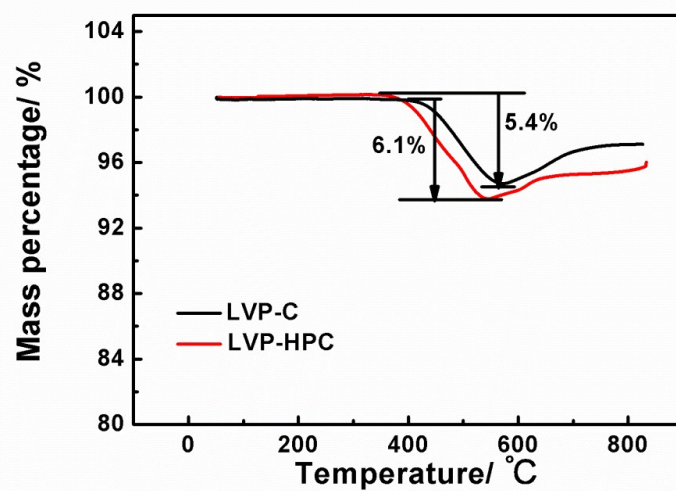

**Fig. S2.** TG curves of the LVP-C and LVP-HPC
